# Supplementary material for: Time trends in demand for family planning satisfied: analysis of 73 countries using national health surveys over a 24-year period
Source: PubMed Central journal article supplement (PMC6820067; doi:10.7189/jogh.09.020423), 2019-12
Supplement: jogh-09-020423-s001.pdf [file jogh-09-020423-s001.pdf]

## Supplementary Material

Table S1. List of countries with available data on mDFPS trends between 1993 and 2016 for married women.

| Region                     | ISO  | Country                   | Year                                           |
|----------------------------|------|---------------------------|------------------------------------------------|
| Middle East & North Africa | EGY  | Egypt                     | 1995, 2000, 2005, 2008, 2014                   |
|                            | IRQ  | Iraq                      | 2006*, 2011*                                   |
|                            | JOR  | Jordan                    | 1997, 2002, 2007, 2012, 2017                   |
|                            | YEM  | Yemen                     | 2006*, 2013                                    |
| West & Central Africa      | BEN  | Benin                     | 1996, 2001, 2006, 2011, 2014*                  |
|                            | BFA  | Burkina Faso              | 1998, 2003, 2006*, 2010                        |
|                            | CAF  | CAR                       | 1994, 2006*, 2010*                             |
|                            | CMR  | Cameroon                  | 1998, 2004, 2011, 2014*                        |
|                            | TCD  | Chad                      | 1996, 2004, 2010*, 2014                        |
|                            | COG  | Congo Brazzaville         | 2005, 2011, 2014*                              |
|                            | COD  | Congo Democratic Republic | 2007, 2010*, 2013                              |
|                            | CIV  | Cote d'Ivoire             | 1994, 1998, 2006, 2011, 2016*                  |
|                            | GAB  | Gabon                     | 2000, 2012                                     |
|                            | GHA  | Ghana                     | 1993, 1998, 2003, 2008, 2011*, 2014            |
|                            | GIN  | Guinea                    | 1999, 2005, 2012, 2016*                        |
|                            | GNB  | Guinea Bissau             | 2006*, 2014*                                   |
|                            | LBR  | Liberia                   | 2007, 2013                                     |
|                            | MLI  | Mali                      | 1995, 2001, 2006, 2009*, 2012, 2015*           |
|                            | MRT  | Mauritania                | 2007*, 2011*, 2015*                            |
|                            | NER  | Niger                     | 1998, 2006, 2012                               |
|                            | NGA  | Nigeria                   | 1999, 2003, 2007*, 2008, 2011*, 2013, 2016*    |
|                            | STP  | Sao Tome and Principe     | 2008, 2014*                                    |
|                            | SEN  | Senegal                   | 1997, 2005, 2010, 2012, 2014, 2015, 2016, 2017 |
|                            | SLE  | Sierra Leone              | 2008, 2010*, 2013                              |
| TGO                        | Togo | 1998, 2006*, 2010*, 2013  |                                                |
| Eastern & Southern Africa  | BDI  | Burundi                   | 2010, 2016                                     |
|                            | COM  | Comoros                   | 1996, 2012                                     |
|                            | SWZ  | Eswatini                  | 2006, 2010*, 2014*                             |
|                            | ETH  | Ethiopia                  | 2000, 2005, 2011, 2016                         |
|                            | KEN  | Kenya                     | 1993, 1998, 2003, 2008, 2014                   |
|                            | LSO  | Lesotho                   | 2004, 2009, 2014                               |
|                            | MWI  | Malawi                    | 2000, 2004, 2010, 2013, 2015                   |
|                            | MOZ  | Mozambique                | 1997, 2003, 2011, 2015                         |
|                            | NAM  | Namibia                   | 2000, 2006, 2013                               |
|                            | RWA  | Rwanda                    | 2000, 2005, 2010, 2014                         |
|                            | ZAF  | South Africa              | 1998, 2016                                     |
|                            | TZA  | Tanzania                  | 1996, 1999, 2004, 2010, 2015                   |
|                            | UGA  | Uganda                    | 1995, 2000, 2006, 2011, 2016                   |
|                            | ZMB  | Zambia                    | 1996, 2001, 2007, 2013                         |

|                               |                     |                        |                                                                                    |
|-------------------------------|---------------------|------------------------|------------------------------------------------------------------------------------|
|                               | ZWE                 | Zimbabwe               | 1994, 1999, 2005, 2010, 2014*, 2015                                                |
| Europe & Central Asia         | ALB                 | Albania                | 2008, 2017                                                                         |
|                               | ARM                 | Armenia                | 2000, 2005, 2010, 2015                                                             |
|                               | BIH                 | Bosnia and Herzegovina | 2006*, 2011*                                                                       |
|                               | KAZ                 | Kazakhstan             | 1995, 1999, 2010*, 2015*                                                           |
|                               | KGZ                 | Kyrgyzstan             | 1997, 2005*, 2012, 2014*                                                           |
|                               | MKD                 | Macedonia              | 2005*, 2011*                                                                       |
|                               | MDA                 | Moldova                | 2005, 2012*                                                                        |
|                               | MNE                 | Montenegro             | 2005*, 2013*                                                                       |
|                               | SRB                 | Serbia                 | 2005*, 2010*, 2014*                                                                |
|                               | TJK                 | Tajikistan             | 2005*, 2012, 2017                                                                  |
|                               | TKM                 | Turkmenistan           | 2006*, 2015*                                                                       |
| UKR                           | Ukraine             | 2005*, 2007, 2012*     |                                                                                    |
| South Asia                    | BGD                 | Bangladesh             | 1993, 1996, 1999, 2004, 2007, 2011, 2012*, 2014                                    |
|                               | IND                 | India                  | 1998, 2005, 2015                                                                   |
|                               | MDV                 | Madives                | 2009, 2016                                                                         |
|                               | NPL                 | Nepal                  | 1996, 2001, 2006, 2010*, 2011, 2014*, 2016                                         |
|                               | PAK                 | Pakistan               | 2006, 2012, 2017                                                                   |
| East Asia & Pacific           | KHM                 | Cambodia               | 2000, 2005, 2010, 2014                                                             |
|                               | IDN                 | Indonesia              | 1994, 1997, 2002, 2007, 2012                                                       |
|                               | MNG                 | Mongolia               | 2005*, 2010*, 2013*                                                                |
|                               | PHL                 | Philippines            | 1993, 1998, 2003, 2008, 2013, 2017                                                 |
|                               | TLS                 | Timor Leste            | 2009, 2016                                                                         |
|                               | VNM                 | Vietnam                | 1997, 2002, 2010*, 2013*                                                           |
| Latin America & the Caribbean | BLZ                 | Belize                 | 2006*, 2011*, 2015*                                                                |
|                               | COL                 | Colombia               | 1995, 2000, 2005, 2010, 2015                                                       |
|                               | CUB                 | Cuba                   | 2006*, 2010*, 2014*                                                                |
|                               | DOM                 | Dominican Republic     | 1996, 1999, 2002, 2007, 2013, 2014*                                                |
|                               | GTM                 | Guatemala              | 1995, 1998, 2014                                                                   |
|                               | GUY                 | Guyana                 | 2006*, 2009, 2014*                                                                 |
|                               | HTI                 | Haiti                  | 1994, 2000, 2005, 2012, 2016                                                       |
|                               | HND                 | Honduras               | 2005, 2011                                                                         |
|                               | PER                 | Peru                   | 1996, 2000, 2004, 2005, 2006, 2007, 2008, 2009, 2010, 2011, 2012, 2014, 2015, 2016 |
| TTO                           | Trinidad and Tobago | 2006*, 2011*           |                                                                                    |

\* following the year represents a MICS survey, all the others are DHS surveys.

Table S2. Average annual absolute change (AAAC) in demand for family planning satisfied with modern methods (mDFPS), in absolute (slope index of inequality, SII) and in relative inequality (concentration index, CIX) by world region.

| Region                     | Unweighted AAAC    |                   |                   | Weighted AAAC      |                   |                   |
|----------------------------|--------------------|-------------------|-------------------|--------------------|-------------------|-------------------|
|                            | mDFPS<br>(p value) | SII<br>(p value)  | CIX<br>(p value)  | mDFPS<br>(p value) | SII<br>(p value)  | CIX<br>(p value)  |
| Middle East & North Africa | 0.21<br>(0.131)    | -0.69<br>(<0.001) | -0.47<br>(<0.001) | -0.37<br>(0.509)   | -0.75<br>(0.302)  | -0.12<br>(0.724)  |
| West & Central Africa      | 0.96<br>(<0.001)   | -0.04<br>(<0.001) | -0.10<br>(<0.001) | 1.02<br>(<0.001)   | 0.12<br>(0.623)   | -0.96<br>(<0.001) |
| Eastern & Southern Africa  | 1.50<br>(<0.001)   | -1.17<br>(<0.001) | -1.10<br>(<0.001) | 1.51<br>(<0.001)   | -1.34<br>(<0.001) | -1.13<br>(<0.001) |
| Europe & Central Asia      | 0.46<br>(0.016)    | -0.02<br>(0.900)  | -0.05<br>(0.565)  | -0.28<br>(0.681)   | 0.11<br>(0.784)   | 0.04<br>(0.869)   |
| South Asia                 | 0.68<br>(0.001)    | -0.91<br>(<0.001) | -0.32<br>(<0.001) | 0.03<br>(0.934)    | -0.58<br>(0.107)  | -0.19<br>(0.139)  |
| East Asia & Pacific        | 0.60<br>(<0.001)   | -1.4<br>(<0.001)  | -0.55<br>(<0.001) | 0.11<br>(0.827)    | -1.34<br>(<0.001) | -0.50<br>(<0.001) |
| Latin America & Caribbean  | 0.74<br>(<0.001)   | -0.87<br>(<0.001) | -0.46<br>(<0.001) | 0.68<br>(0.049)    | -0.87<br>(0.002)  | -0.47<br>(<0.001) |
| All countries              | 0.91<br>(<0.001)   | -0.69<br>(<0.001) | -0.47<br>(<0.001) | 0.64<br>(0.002)    | -0.63<br>(<0.001) | -0.65<br>(<0.001) |

Table S3. Demand for family planning satisfied with modern methods among both, only partnered and all sexually active women (ordered according to differences in coverage).

| Region                    | Country                | Year | Source | mDFPS (%)     |                       |
|---------------------------|------------------------|------|--------|---------------|-----------------------|
|                           |                        |      |        | Married women | Sexually active women |
| West & Central Africa     | Guinea Bissau          | 2006 | MICS   | 18.3          | 29.2                  |
|                           |                        | 2014 | MICS   | 34.4          | 50.1                  |
| Europe & Central Asia     | Serbia                 | 2005 | MICS   | 29.6          | 35.1                  |
|                           |                        | 2010 | MICS   | 35.5          | 49.1                  |
| West & Central Africa     | Cameroon               | 1998 | DHS    | 18.2          | 20.7                  |
|                           |                        | 2004 | DHS    | 27.0          | 30.7                  |
|                           |                        | 2011 | DHS    | 30.1          | 34.9                  |
|                           |                        | 2014 | MICS   | 36.4          | 46.3                  |
| West & Central Africa     | Sierra Leone           | 2008 | DHS    | 17.0          | 19.7                  |
|                           |                        | 2010 | MICS   | 26.6          | 33.4                  |
| Europe & Central Asia     | Montenegro             | 2013 | DHS    | 35.3          | 43.5                  |
|                           |                        | 2005 | MICS   | 29.2          | 30.7                  |
| West & Central Africa     | Gabon                  | 2013 | MICS   | 40.5          | 47.6                  |
|                           |                        | 2000 | DHS    | 19.4          | 24.4                  |
| Europe & Central Asia     | Bosnia and Herzegovina | 2012 | DHS    | 32.8          | 39.6                  |
|                           |                        | 2006 | MICS   | 22.5          | 24.6                  |
| Eastern & Southern Africa | Mozambique             | 2011 | MICS   | 23.0          | 29.0                  |
|                           |                        | 1997 | DHS    | 18.1          | 19.7                  |
| Eastern & Southern Africa | Mozambique             | 2003 | DHS    | 26.7          | 31.9                  |
|                           |                        | 2011 | DHS    | 31.4          | 33.5                  |
|                           |                        | 2015 | DHS    | 48.0          | 50.3                  |
| West & Central Africa     | Guinea                 | 1999 | DHS    | 13.9          | 16.1                  |
|                           |                        | 2005 | DHS    | 13.0          | 16.4                  |
|                           |                        | 2012 | DHS    | 11.3          | 16.3                  |
| West & Central Africa     | Cote d'Ivoire          | 2016 | MICS   | 22.1          | 24.6                  |
|                           |                        | 1994 | DHS    | 11.2          | 15.3                  |
|                           |                        | 1998 | DHS    | 17.0          | 21.5                  |
| Eastern & Southern Africa | Namibia                | 2011 | DHS    | 25.6          | 28.2                  |
|                           |                        | 2016 | MICS   | 31.3          | 33.0                  |
|                           |                        | 2006 | DHS    | 70.7          | 74.9                  |
| LAC                       | Paraguay               | 2000 | DHS    | 64.7          | 65.8                  |
|                           |                        | 2013 | DHS    | 74.7          | 78.1                  |
|                           |                        | 2016 | MICS   | 86.4          | 82.5                  |
| West & Central Africa     | Nigeria                | 1999 | DHS    | 26.1          | 28.4                  |
|                           |                        | 2003 | DHS    | 23.3          | 26.8                  |
|                           |                        | 2007 | MICS   | 30.1          | 32.6                  |
|                           |                        | 2008 | DHS    | 23.3          | 26.9                  |
|                           |                        | 2011 | MICS   | 29.9          | 32.6                  |
|                           |                        | 2013 | DHS    | 28.6          | 32.7                  |
| West & Central Africa     | Congo Brazzaville      | 2016 | MICS   | 26.4          | 26.8                  |
|                           |                        | 2005 | DHS    | 19.9          | 22.6                  |
|                           |                        | 2011 | DHS    | 29.1          | 32.9                  |
|                           |                        | 2014 | MICS   | 37.1          | 39.2                  |

|                           |                           |      |      |      |      |
|---------------------------|---------------------------|------|------|------|------|
| Europe & Central Asia     | Ukraine                   | 2007 | DHS  | 61.6 | 65.4 |
|                           |                           | 2012 | MICS | 69.4 | 70.7 |
| West & Central Africa     | Togo                      | 1998 | DHS  | 12.5 | 14.7 |
|                           |                           | 2006 | MICS | 19.8 | 23.0 |
|                           |                           | 2010 | MICS | 25.5 | 27.9 |
|                           |                           | 2013 | DHS  | 32.2 | 34.1 |
| West & Central Africa     | Congo Democratic Republic | 2007 | DHS  | 12.9 | 15.8 |
|                           |                           | 2010 | MICS | 12.5 | 13.4 |
|                           |                           | 2013 | DHS  | 14.8 | 16.2 |
| LAC                       | Costa Rica                | 2011 | MICS | 89.3 | 86.8 |
| Eastern & Southern Africa | Angola                    | 2015 | DHS  | 23.8 | 26.8 |
|                           |                           | 1998 | DHS  | 12.8 | 15.5 |
| West & Central Africa     | Burkina Faso              | 2003 | DHS  | 20.3 | 22.8 |
|                           |                           | 2006 | MICS | 27.9 | 29.1 |
|                           |                           | 2010 | DHS  | 36.6 | 38.1 |
|                           |                           | 1995 | DHS  | 17.8 | 19.0 |
| Eastern & Southern Africa | Uganda                    | 2000 | DHS  | 24.4 | 26.6 |
|                           |                           | 2006 | DHS  | 29.0 | 31.5 |
|                           |                           | 2011 | DHS  | 40.2 | 41.3 |
|                           |                           | 2016 | DHS  | 49.7 | 50.4 |
| LAC                       | Dominican Republic        | 1996 | DHS  | 76.2 | 75.2 |
|                           |                           | 1999 | DHS  | 77.2 | 76.9 |
|                           |                           | 2002 | DHS  | 79.7 | 78.5 |
|                           |                           | 2007 | DHS  | 82.6 | 80.9 |
|                           |                           | 2013 | DHS  | 82.4 | 80.5 |
|                           |                           | 2014 | MICS | 85.2 | 82.9 |
| West & Central Africa     | Liberia                   | 2007 | DHS  | 21.8 | 24.0 |
|                           |                           | 2013 | DHS  | 37.0 | 38.3 |
| LAC                       | Guyana                    | 2009 | DHS  | 56.0 | 57.9 |
|                           |                           | 2014 | MICS | 52.4 | 51.6 |
| East Asia & Pacific       | Mongolia                  | 2010 | MICS | 79.9 | 78.4 |
|                           |                           | 2013 | MICS | 74.9 | 73.0 |
| West & Central Africa     | Central African Republic  | 1994 | DHS  | 10.4 | 12.3 |
|                           |                           | 2006 | MICS | 24.0 | 24.2 |
|                           |                           | 2010 | MICS | 23.8 | 24.6 |
| West & Central Africa     | Benin                     | 1996 | DHS  | 8.1  | 9.0  |
|                           |                           | 2001 | DHS  | 14.8 | 15.5 |
|                           |                           | 2006 | DHS  | 12.8 | 14.6 |
| Eastern & Southern Africa | South Africa              | 2011 | DHS  | 16.3 | 18.0 |
|                           |                           | 1998 | DHS  | 77.4 | 77.6 |
|                           |                           | 2016 | DHS  | 77.8 | 75.7 |
| LAC                       | Belize                    | 2011 | MICS | 73.1 | 71.4 |
|                           |                           | 2015 | MICS | 67.1 | 64.8 |
| LAC                       | Mexico                    | 2015 | MICS | 85.8 | 82.9 |
| LAC                       | Panama                    | 2013 | MICS | 76.4 | 74.5 |
| Eastern & Southern Africa | Zambia                    | 1996 | DHS  | 28.8 | 29.0 |
|                           |                           | 2001 | DHS  | 36.8 | 37.2 |
|                           |                           | 2007 | DHS  | 39.4 | 40.2 |
|                           |                           | 2013 | DHS  | 62.4 | 60.7 |

|                           |                       |      |      |      |      |
|---------------------------|-----------------------|------|------|------|------|
| Eastern & Southern Africa | Comoros               | 1996 | DHS  | 20.5 | 21.9 |
|                           |                       | 2012 | DHS  | 25.8 | 26.2 |
| Eastern & Southern Africa | Tanzania              | 1996 | DHS  | 31.9 | 33.0 |
|                           |                       | 1999 | DHS  | 35.7 | 36.5 |
|                           |                       | 2004 | DHS  | 39.3 | 40.6 |
|                           |                       | 2010 | DHS  | 46.9 | 48.3 |
|                           |                       | 2015 | DHS  | 52.1 | 52.9 |
| West & Central Africa     | Mali                  | 1995 | DHS  | 14.8 | 16.2 |
|                           |                       | 2001 | DHS  | 15.7 | 16.3 |
|                           |                       | 2006 | DHS  | 16.0 | 16.2 |
|                           |                       | 2009 | MICS | 22.4 | 22.7 |
|                           |                       | 2012 | DHS  | 27.1 | 27.7 |
| West & Central Africa     | Ghana                 | 2015 | MICS | 34.0 | 34.7 |
|                           |                       | 1993 | DHS  | 17.8 | 17.8 |
|                           |                       | 1998 | DHS  | 23.1 | 23.6 |
|                           |                       | 2003 | DHS  | 31.0 | 31.7 |
|                           |                       | 2008 | DHS  | 28.2 | 29.4 |
| LAC                       | Peru                  | 2011 | MICS | 40.0 | 41.4 |
|                           |                       | 2014 | DHS  | 38.4 | 37.7 |
|                           |                       | 1996 | DHS  | 50.8 | 50.8 |
|                           |                       | 2000 | DHS  | 60.3 | 59.6 |
|                           |                       | 2004 | DHS  | 55.8 | 55.8 |
|                           |                       | 2005 | DHS  | 57.5 | 58.6 |
|                           |                       | 2006 | DHS  | 57.7 | 58.0 |
|                           |                       | 2007 | DHS  | 56.1 | 56.5 |
|                           |                       | 2008 | DHS  | 57.9 | 59.3 |
|                           |                       | 2009 | DHS  | 59.5 | 60.3 |
| West & Central Africa     | Chad                  | 2010 | DHS  | 59.7 | 60.6 |
|                           |                       | 2011 | DHS  | 60.2 | 61.4 |
|                           |                       | 2012 | DHS  | 61.0 | 62.0 |
|                           |                       | 2014 | DHS  | 61.9 | 62.6 |
| West & Central Africa     | Chad                  | 2015 | DHS  | 64.0 | 64.9 |
|                           |                       | 2016 | DHS  | 64.5 | 65.3 |
|                           |                       | 1996 | DHS  | 8.4  | 9.4  |
| Eastern & Southern Africa | Malawi                | 2004 | DHS  | 5.4  | 5.8  |
|                           |                       | 2010 | MICS | 5.6  | 6.9  |
|                           |                       | 2014 | DHS  | 14.0 | 14.7 |
|                           |                       | 2000 | DHS  | 45.5 | 45.1 |
| Eastern & Southern Africa | Malawi                | 2004 | DHS  | 45.6 | 45.0 |
|                           |                       | 2010 | DHS  | 58.5 | 58.3 |
|                           |                       | 2013 | MICS | 74.8 | 74.0 |
|                           |                       | 2015 | DHS  | 74.4 | 73.2 |
| Eastern & Southern Africa | Eswatini              | 2006 | DHS  | 62.9 | 63.9 |
|                           |                       | 2010 | MICS | 81.9 | 83.0 |
|                           |                       | 2014 | MICS | 85.3 | 85.8 |
| West & Central Africa     | Sao Tome and Principe | 2008 | DHS  | 43.8 | 44.9 |
|                           |                       | 2014 | MICS | 52.1 | 51.5 |
| Eastern & Southern Africa | Ethiopia              | 2000 | DHS  | 14.6 | 15.7 |
|                           |                       | 2005 | DHS  | 28.2 | 28.4 |
|                           |                       | 2011 | DHS  | 49.7 | 50.2 |

|                           |             |      |      |      |      |
|---------------------------|-------------|------|------|------|------|
|                           |             | 2016 | DHS  | 59.5 | 59.6 |
| Eastern & Southern Africa | Rwanda      | 2000 | DHS  | 8.8  | 9.2  |
|                           |             | 2005 | DHS  | 16.3 | 16.1 |
|                           |             | 2010 | DHS  | 60.8 | 60.4 |
|                           |             | 2014 | DHS  | 64.3 | 63.3 |
| LAC                       | Colombia    | 1995 | DHS  | 71.5 | 70.8 |
|                           |             | 2000 | DHS  | 73.4 | 72.7 |
|                           |             | 2005 | DHS  | 78.4 | 77.3 |
|                           |             | 2010 | DHS  | 83.5 | 83.0 |
|                           |             | 2015 | DHS  | 86.5 | 85.6 |
| Europe & Central Asia     | Kosovo      | 2013 | MICS | 21.0 | 22.3 |
| Europe & Central Asia     | Belarus     | 2012 | MICS | 76.0 | 77.0 |
| West & Central Africa     | Niger       | 1998 | DHS  | 18.5 | 19.5 |
|                           |             | 2006 | DHS  | 18.5 | 18.7 |
|                           |             | 2012 | DHS  | 27.7 | 27.8 |
| Europe & Central Asia     | Kazakhstan  | 1995 | DHS  | 61.5 | 61.2 |
|                           |             | 1999 | DHS  | 70.2 | 69.6 |
|                           |             | 2010 | MICS | 81.4 | 81.4 |
|                           |             | 2015 | MICS | 85.4 | 84.6 |
| Eastern & Southern Africa | Madagascar  | 1997 | DHS  | 21.7 | 21.1 |
|                           |             | 2003 | DHS  | 33.0 | 32.9 |
|                           |             | 2008 | DHS  | 47.9 | 47.0 |
| LAC                       | Haiti       | 1994 | DHS  | 21.3 | 21.8 |
|                           |             | 2000 | DHS  | 32.9 | 33.2 |
|                           |             | 2005 | DHS  | 34.0 | 34.1 |
|                           |             | 2012 | DHS  | 44.2 | 43.5 |
|                           |             | 2016 | DHS  | 43.1 | 41.8 |
| West & Central Africa     | Gambia      | 2013 | DHS  | 23.8 | 24.5 |
| LAC                       | Bolivia     | 1994 | DHS  | 24.0 | 24.1 |
|                           |             | 1998 | DHS  | 33.9 | 34.3 |
|                           |             | 2003 | DHS  | 31.9 | 32.4 |
|                           |             | 2008 | DHS  | 41.7 | 42.4 |
| Eastern & Southern Africa | Lesotho     | 2004 | DHS  | 51.4 | 52.1 |
|                           |             | 2009 | DHS  | 65.2 | 65.3 |
|                           |             | 2014 | DHS  | 76.1 | 76.3 |
| Europe & Central Asia     | Albania     | 2008 | DHS  | 12.5 | 13.1 |
|                           |             | 2017 | DHS  | 6.0  | 6.1  |
| LAC                       | El Salvador | 2014 | MICS | 85.0 | 83.2 |
| Eastern & Southern Africa | Zimbabwe    | 1994 | DHS  | 64.7 | 64.7 |
|                           |             | 1999 | DHS  | 72.6 | 72.2 |
|                           |             | 2005 | DHS  | 78.4 | 78.0 |
|                           |             | 2010 | DHS  | 78.1 | 77.8 |
|                           |             | 2014 | MICS | 88.1 | 87.5 |
|                           |             | 2015 | DHS  | 84.9 | 84.4 |
| Europe & Central Asia     | Kyrgyzstan  | 1997 | DHS  | 68.7 | 68.6 |
|                           |             | 2005 | MICS | 74.3 | 74.4 |
|                           |             | 2012 | DHS  | 61.5 | 61.0 |
| East Asia & Pacific       | Lao         | 2011 | MICS | 68.6 | 68.0 |
|                           |             | 1993 | DHS  | 40.0 | 40.0 |
| Eastern & Southern        | Kenya       | 1998 | DHS  | 48.5 | 48.1 |

|                           |                     |      |      |      |      |
|---------------------------|---------------------|------|------|------|------|
| Africa                    |                     | 2003 | DHS  | 47.9 | 48.1 |
|                           |                     | 2008 | DHS  | 54.8 | 54.7 |
|                           |                     | 2014 | DHS  | 70.5 | 70.2 |
| LAC                       | Brazil              | 1996 | DHS  | 81.9 | 81.5 |
| Europe & Central Asia     | Moldova             | 2005 | DHS  | 56.6 | 56.2 |
|                           |                     | 2012 | MICS | 66.5 | 66.3 |
| West & Central Africa     | Senegal             | 1997 | DHS  | 17.0 | 17.0 |
|                           |                     | 2005 | DHS  | 23.1 | 23.4 |
|                           |                     | 2010 | DHS  | 27.5 | 27.6 |
|                           |                     | 2012 | DHS  | 33.8 | 33.9 |
|                           |                     | 2014 | DHS  | 42.2 | 42.6 |
|                           |                     | 2015 | DHS  | 43.2 | 43.4 |
|                           |                     | 2016 | DHS  | 45.2 | 45.3 |
| East Asia & Pacific       | Philippines         | 1993 | DHS  | 36.4 | 36.4 |
|                           |                     | 1998 | DHS  | 40.3 | 40.3 |
|                           |                     | 2003 | DHS  | 48.0 | 47.8 |
|                           |                     | 2008 | DHS  | 45.9 | 45.6 |
|                           |                     | 2013 | DHS  | 50.8 | 50.4 |
| East Asia & Pacific       | Timor Leste         | 2017 | DHS  | 56.0 | 55.3 |
|                           |                     | 2009 | DHS  | 38.8 | 38.8 |
| LAC                       | Cuba                | 2016 | DHS  | 45.8 | 45.4 |
|                           |                     | 2010 | MICS | 89.7 | 89.8 |
| LAC                       | Barbados            | 2014 | MICS | 89.7 | 89.5 |
| LAC                       | Trinidad and Tobago | 2012 | MICS | 70.7 | 70.9 |
|                           |                     | 2006 | MICS | 56.2 | 56.3 |
| Europe & Central Asia     | Armenia             | 2011 | MICS | 64.3 | 61.0 |
|                           |                     | 2000 | DHS  | 27.7 | 27.6 |
|                           |                     | 2005 | DHS  | 28.6 | 28.7 |
|                           |                     | 2010 | DHS  | 38.1 | 38.2 |
| LAC                       | Honduras            | 2015 | DHS  | 38.9 | 39.1 |
|                           |                     | 2005 | DHS  | 68.4 | 68.5 |
| Europe & Central Asia     | Uzbekistan          | 2011 | DHS  | 76.0 | 75.9 |
|                           |                     | 1996 | DHS  | 74.1 | 74.0 |
| Eastern & Southern Africa | Burundi             | 2006 | MICS | 83.0 | 83.0 |
|                           |                     | 2010 | DHS  | 32.6 | 32.7 |
| South Asia                | Bhutan              | 2016 | DHS  | 38.3 | 38.5 |
|                           |                     | 2010 | MICS | 85.8 | 85.6 |
| LAC                       | Guatemala           | 1995 | DHS  | 47.5 | 47.4 |
|                           |                     | 1998 | DHS  | 49.6 | 49.7 |
|                           |                     | 2014 | DHS  | 65.3 | 65.4 |
| East Asia & Pacific       | Cambodia            | 2000 | DHS  | 34.6 | 34.6 |
|                           |                     | 2005 | DHS  | 41.6 | 41.6 |
|                           |                     | 2010 | DHS  | 51.4 | 51.4 |
|                           |                     | 2014 | DHS  | 56.1 | 56.0 |
| East Asia & Pacific       | Vietnam             | 2010 | MICS | 75.1 | 75.0 |
| East Asia & Pacific       | Myanmar             | 2015 | DHS  | 74.8 | 74.7 |
| LAC                       | St. Lucia           | 2012 | MICS | 72.5 | 72.3 |
| East Asia & Pacific       | Indonesia           | 2012 | DHS  | 78.9 | 78.9 |
| South Asia                | India               | 2005 | DHS  | 69.9 | 69.9 |
|                           |                     | 2015 | DHS  | 71.8 | 71.8 |



|                       |            |      |      |      |      |
|-----------------------|------------|------|------|------|------|
| Europe & Central Asia | Azerbaijan | 2006 | DHS  | 17.8 | 17.8 |
| Europe & Central Asia | Macedonia  | 2005 | MICS | 21.7 | 21.7 |
|                       |            | 2006 | DHS  | 60.9 | 60.9 |
| South Asia            | Nepal      | 2011 | DHS  | 55.9 | 55.9 |
|                       |            | 2016 | DHS  | 56.0 | 56.0 |
| Europe & Central Asia | Tajikistan | 2012 | DHS  | 50.6 | 50.6 |
|                       |            | 2017 | DHS  | 50.4 | 50.4 |

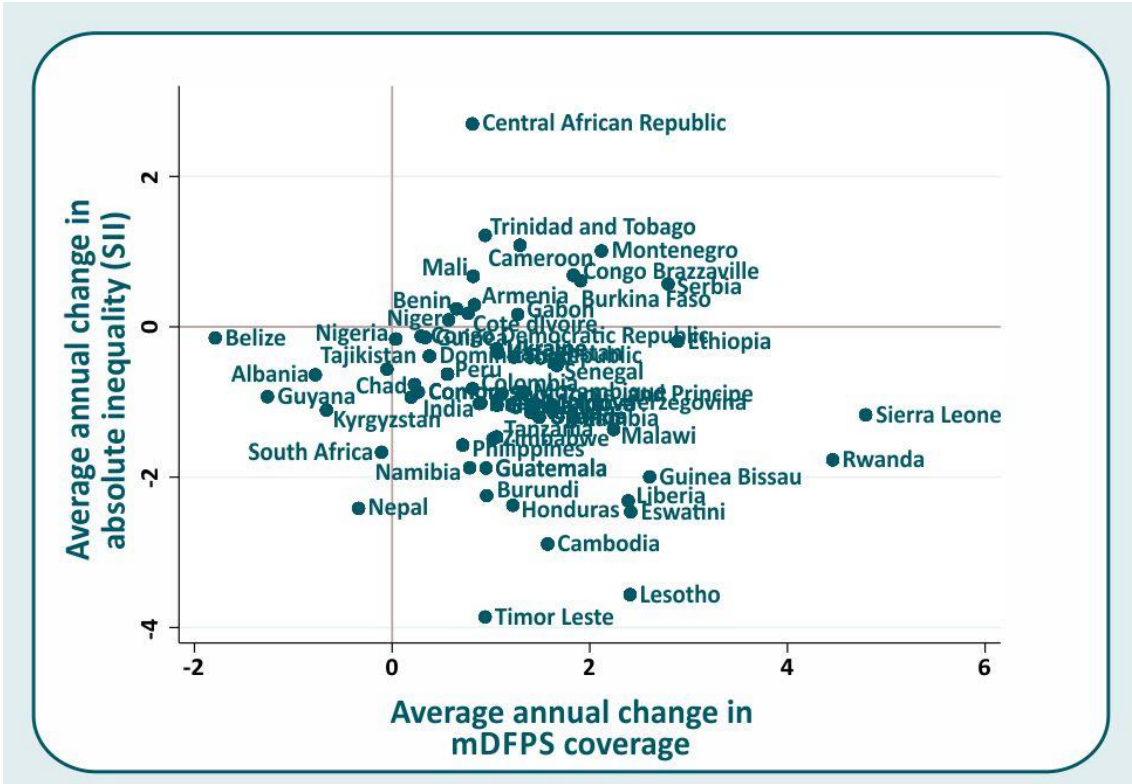

Figure S1. Average annual change in demand for family planning satisfied with modern methods (mDFPS) vs. average annual change in the slope index of inequality (SII) in mDFPS (all sexually active women).

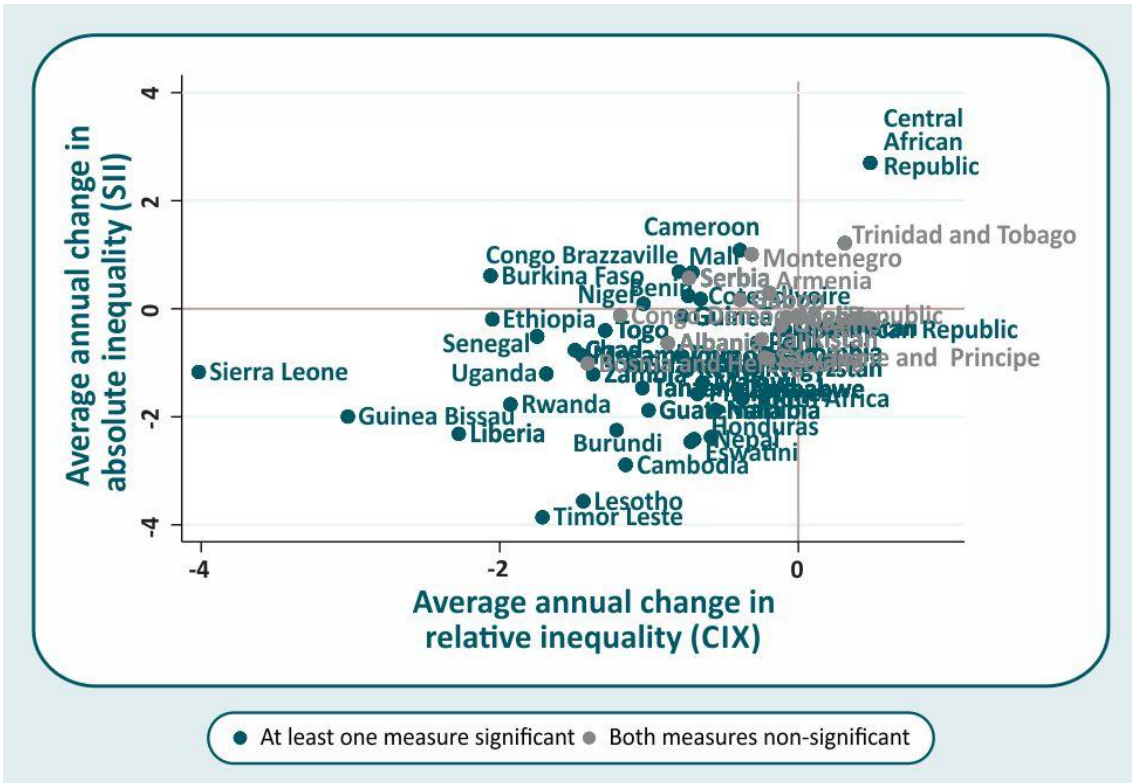

Figure S2. Trends in demand for family planning satisfied with modern methods (mDFPS) and in absolute inequality (SII) in mDFPS according to world region. Average annual change in the concentration index of inequality in demand for family planning satisfied with modern methods (mDFPS) vs. average annual change in the slope index of inequality (SII) in mDFPS (all sexually active women).
